# Supplementary material for: CircRNA-Mediated Regulation of Angiogenesis: A New Chapter in Cancer Biology
Source: PubMed Central journal article supplement (PMC7988083; doi:10.3389/fonc.2021.553706), 2021-03-10
Supplement: DataSheet_1.pdf [file DataSheet_1.pdf]

**Supplementary Table 1. Software commonly used to explore circRNAs.**

| Num | Name            | Website                                                                                                                         | Function                                                                                                                                                                                           | Ref  |
|-----|-----------------|---------------------------------------------------------------------------------------------------------------------------------|----------------------------------------------------------------------------------------------------------------------------------------------------------------------------------------------------|------|
| 1   | circBase        | <a href="http://www.circbase.org/">http://www.circbase.org/</a>                                                                 | The circRNAs from human, mouse and other species were collected, and the find_CIRc software was used to predict the circRNAs from the ribosomal library.                                           | [1]  |
| 2   | CircNet         | <a href="http://circnet.mbc.nctu.edu.tw/">http://circnet.mbc.nctu.edu.tw/</a>                                                   | A database based on systematic analysis of transcriptome data from 464 samples                                                                                                                     | [2]  |
| 3   | CircInteractome | <a href="https://circinteractome.nia.nih.gov/">https://circinteractome.nia.nih.gov/</a>                                         | This database predicts the binding sites of known RNA-binding protein datasets and circRNA in circBase.                                                                                            | [3]  |
| 4   | CIRCpedia       | <a href="http://www.picb.ac.cn/rnomics/circpedia/">http://www.picb.ac.cn/rnomics/circpedia/</a>                                 | The database provided information such as the origin gene of circRNA ID, corresponding linear transcript, expression quantity, starting and ending location of exons, cell line, and conservatism. | [4]  |
| 5   | cRNADb          | <a href="http://reprod.njmu.edu.cn/cgi-bin/circnadb/circRNADb.php">http://reprod.njmu.edu.cn/cgi-bin/circnadb/circRNADb.php</a> | A database summarizing the protein-coding human circRNAs.                                                                                                                                          | NA   |
| 6   | deepBase        | <a href="http://rna.sysu.edu.cn/deepbase3/">http://rna.sysu.edu.cn/deepbase3/</a>                                               | This database annotates and identifies circRNA/sRNA et al and their expression patterns from the new generation sequencing technology data                                                         | [5]  |
| 7   | circRNA Disease | <a href="http://cgga.org.cn:9091/circRNADisease/">http://cgga.org.cn:9091/circRNADisease/</a>                                   | The database was constructed mainly through literature retrieval of all relevant research results of circRNA and disease                                                                           | [6]  |
| 8   | MiOncoCirc      | <a href="https://mioncocirc.github.io/">https://mioncocirc.github.io/</a>                                                       | The database links circRNA to clinical symptoms and disease.                                                                                                                                       | [7]  |
| 9   | cir2traits      | <a href="http://gyanxet-beta.com/circdb/">http://gyanxet-beta.com/circdb/</a>                                                   | The database collects circRNA related to human diseases                                                                                                                                            | [8]  |
| 10  | CSCD            | <a href="http://gb.whu.edu.cn/CSCD/">http://gb.whu.edu.cn/CSCD/</a>                                                             | CSCD contains tumor-specific circrnas                                                                                                                                                              | [9]  |
| 11  | CircFunBase     | <a href="http://bis.zju.edu.cn/CircFunBaseBlast/">http://bis.zju.edu.cn/CircFunBaseBlast/</a>                                   | Based on qRT-PCR, the expression patterns of circleRNA in dozens of diseases were provided                                                                                                         | NA   |
| 12  | BIOINF          | <a href="http://www.bioinf.com.cn/">http://www.bioinf.com.cn/</a>                                                               | Primer design for circRNA                                                                                                                                                                          | [10] |
| 13  | exoRBase        | <a href="http://www.exoRBase.org">www.exoRBase.org</a>                                                                          | Lncrnas in plasma exosomes were included in this database                                                                                                                                          | [11] |

# Reference

- [1] Glažar P, Papavasileiou P, Rajewsky N (2014). circBase: a database for circular RNAs. *Rna*, 20:1666-1670.
- [2] Liu YC, Li JR, Sun CH, Andrews E, Chao RF, Lin FM, *et al.* (2016). CircNet: a database of circular RNAs derived from transcriptome sequencing data. *Nucleic Acids Res*, 44:D209-D215.
- [3] Dudekula DB, Panda AC, Grammatikakis I, De S, Abdelmohsen K, Gorospe M (2016). CircInteractome: A web tool for exploring circular RNAs and their interacting proteins and microRNAs. *RNA Biol*, 13:34-42.
- [4] Dong R, Ma XK, Li GW, Yang L (2018). CIRCpedia v2: An Updated Database for Comprehensive Circular RNA Annotation and Expression Comparison. *Genomics Proteomics Bioinformatics*, 16:226-233.
- [5] Zheng LL, Li JH, Wu J, Sun WJ, Liu S, Wang ZL, *et al.* (2016). deepBase v2.0: identification, expression, evolution and function of small RNAs, lncRNAs and circular RNAs from deep-sequencing data. *Nucleic Acids Res*, 44:D196-D202.
- [6] Zhao Z, Wang K, Wu F, Wang W, Zhang K, Hu H, *et al.* (2018). circRNA disease: a manually curated database of experimentally supported circRNA-disease associations. *Cell Death Dis*, 9:475.
- [7] Robinson DR, Wu YM, Lonigro RJ, Vats P, Cobain E, Everett J, *et al.* (2017). Integrative clinical genomics of metastatic cancer. *Nature*, 548:297-303.
- [8] Ghosal S, Das S, Sen R, Basak P, Chakrabarti J (2013). Circ2Traits: a comprehensive database for circular RNA potentially associated with disease and traits. *Front Genet*, 4:283.
- [9] Xia S, Feng J, Chen K, Ma Y, Gong J, Cai F, *et al.* (2018). CSCD: a database for cancer-specific circular RNAs. *Nucleic Acids Res*, 46:D925-D929.
- [10] Zhong S, Wang J, Zhang Q, Xu H, Feng J (2018). CircPrimer: a software for annotating circRNAs and determining the specificity of circRNA primers. *BMC Bioinformatics*, 19:292.
- [11] Li S, Li Y, Chen B, Zhao J, Yu S, Tang Y, *et al.* (2018). exoRBase: a database of circRNA, lncRNA and mRNA in human blood exosomes. *Nucleic Acids Res*, 46:D106-D112.
